# Supplementary material for: Insight into the Phylogeny and Binding Ability of WRKY Transcription Factors
Source: MDPI journal article supplement (doi:10.3390/ijms23052895), 2022-03-07
Supplement: s1 [file s1]

Supplementary Figure S1. Phylogeny of WRKY TFs across plant kingdom  
Characters in red denote *Arabidopsis* WRKY TFs.
